# Supplementary material for: Protocol for the Wessex AsThma CoHort of difficult asthma (WATCH): a pragmatic real-life longitudinal study of difficult asthma in the clinic
Source: Springer Nature journal article supplement (doi:10.1186/s12890-019-0862-2), 2019-05-24
Supplement: MOESM1 [file 16748764]

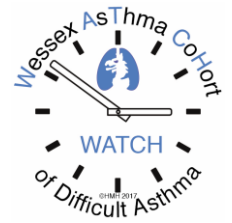

## Enrolment CRF

Subject No. **W 0 0** \_ \_ \_ / \_ \_ \_

Visit Date DD / MM / YY

### 1. Screening and Consent

1.1 Screening Date DD / MM / YY

1.2 Study Site Southampton  Isle of Wight  Portsmouth

1.3 Is a new patient? Yes  No   
(i.e. new to asthma clinic)

#### 1.4 Inclusion Criteria

All patients referred to the Adult or Transitional Regional Asthma Clinic at UHSFT or other participating hospitals who are on high-dose therapies (high dose ICS plus multiple controller therapies), with or without continuous or frequent oral steroids (or oral steroid sparing strategies/ biological therapies) as defined by the British Thoracic Society (BTS) Adult Asthma Management Guidelines (2016).

Does the patient fulfill these criteria?

#### 1.5 Informed consent

Has the patient been informed both verbally and in writing about the objectives of the cohort, the methods, the benefits and potential risks and of the discomfort to which he/she may be exposed and has given written consent to participate in the study prior to any study specific procedures being carried out?

Yes  No  → Obtain informed consent or reschedule visit

|                      |                                                                                                                                    |
|----------------------|------------------------------------------------------------------------------------------------------------------------------------|
| Consent taken by     | <input type="text"/>                                                                                                               |
| Date of consent      | <u>DD</u> / <u>MM</u> / <u>YY</u>                                                                                                  |
| Consent form version | <input type="text"/>                                                                                                               |
| Copies to:           | a) Patient? <input type="checkbox"/> b) Hospital Notes? <input type="checkbox"/> c) Site file? (original) <input type="checkbox"/> |

## 2. Demographic Data

2.1 Date of birth    Age  years

2.2 Gender Male  Female

2.3 Ethnic Group *Tick ONE only*

|                                        |                                                            |
|----------------------------------------|------------------------------------------------------------|
| Caucasian <input type="radio"/>        | Polynesian <input type="radio"/>                           |
| Afro-Caribbean <input type="radio"/>   | Indian Sub-continent <input type="radio"/>                 |
| Hispanic <input type="radio"/>         | Mixed <input type="radio"/> → Specify <input type="text"/> |
| North-east Asian <input type="radio"/> | Other <input type="radio"/> → Specify <input type="text"/> |
| South-east Asian <input type="radio"/> |                                                            |

Comments

2.4 Height  metres How obtained? Measured  Asked patient

2.5 Weight  kg How obtained? Measured  Asked patient

2.6 Working Status *Tick ONE only*

Working full-time

Working part-time due to asthma-related ill-health

Working part-time due to other causes

Not working due to asthma-related ill-health

Not working due to other causes  → Other causes

2.7 Occupation   
*(Include position and nature of work)*

2.8 Has there ever been an occupational component to your asthma? Yes  No  Not known

→ Note any known irritants / products / components or stressors associated

2.9 Do you have regular exposure to pets / animals?

a) In your household? Yes  No

→ Specify:

b) Elsewhere? Yes  No

→ Specify:

**3. Asthma History**3.1 Year of diagnosis     or Not known 3.2 Age at diagnosis Under 6  6 to 11  12 to 18  19 to 40  41 to 60  Over 60  N/K 3.3 Year of onset of symptoms     or Not known 

3.4 Asthma triggers (Tick all that apply)

|                                                                     |                                                       |                                                         |
|---------------------------------------------------------------------|-------------------------------------------------------|---------------------------------------------------------|
| <b>Cold air</b>                                                     |                                                       | <input type="checkbox"/>                                |
| <b>Climate</b>                                                      | e.g. changes in temperature or humidity               | <input type="checkbox"/>                                |
| <b>Fumes</b>                                                        | e.g. smoke, perfume or sprays                         | <input type="checkbox"/>                                |
| <b>Allergens</b>                                                    | e.g. HDM, animals or moulds                           | <input type="checkbox"/>                                |
| <b>Medications</b>                                                  | e.g. Beta-blockers or NSAIDs                          | <input type="checkbox"/>                                |
| <b>Emotion</b>                                                      | e.g. stress or bereavement                            | <input type="checkbox"/>                                |
| <b>Hormonal</b>                                                     | e.g. pre-menstrual or during pregnancy                | <input type="checkbox"/>                                |
| <b>Night time or early morning</b>                                  |                                                       | <input type="checkbox"/>                                |
| <b>Foods</b>                                                        | e.g. tartrazine, MSG, sulphites, peanuts or shellfish | <input type="checkbox"/>                                |
| <b>Workplace</b>                                                    | e.g. Exposure to agents you have become sensitised to | <input type="checkbox"/>                                |
| <b>Viral respiratory tract infections, common cold or influenza</b> |                                                       | <input type="checkbox"/>                                |
| <b>Exercise</b>                                                     |                                                       | <input type="checkbox"/>                                |
| <b>Air pollution</b>                                                |                                                       | <input type="checkbox"/>                                |
| <b>Alcohol</b>                                                      |                                                       | <input type="checkbox"/>                                |
| <b>Others</b>                                                       |                                                       | <input type="checkbox"/> → Specify <input type="text"/> |

3.5 Do you self-manage exacerbations? Yes  No 3.6 Total number of asthma-related Intensive Care Unit (ICU) visits (ever)  or Not known 3.7 Ever intubated? Yes  No  Not known 

3.8 In the last 12 months (approx.), how many asthma-related... (If zero, enter zero)

|                                                                                      |                                            |                                                                                                                |
|--------------------------------------------------------------------------------------|--------------------------------------------|----------------------------------------------------------------------------------------------------------------|
| a) ... visits to GP                                                                  | <input type="text"/>                       | or Not known <input type="checkbox"/>                                                                          |
| b) ... visits to Emergency Dept. (ED)                                                | <input type="text"/>                       | or Not known <input type="checkbox"/>                                                                          |
| c) ... hospitalisations                                                              | <input type="text"/>                       | or Not known <input type="checkbox"/>                                                                          |
| d) ... courses of oral corticosteroids (OCS)                                         | <input type="text"/>                       | or Not known <input type="checkbox"/>                                                                          |
| <small>(If on maintenance, record the number of times needed to double-dose)</small> |                                            |                                                                                                                |
|                                                                                      | ↳ If > 0: Dose <input type="text"/> mg/day | Duration <input type="text"/> days                                                                             |
| e) ... days lost from work/education                                                 | <input type="text"/>                       | or Not known <input type="checkbox"/> or Not applic. <input type="checkbox"/> (i.e. not in work nor education) |
| f) ... courses of antibiotics                                                        | <input type="text"/>                       | or Not known <input type="checkbox"/>                                                                          |
|                                                                                      | ↳ If > 0, which antibiotics?               | <input type="text"/>                                                                                           |

3.9 Are you on long-term antibiotics? Yes  No ↳ Which antibiotic(s)? 3.10 Any family history of asthma? Yes  No  Not known 

↳ Who? Father  Mother   
 (Tick all that apply) Brother  Sister  Children   
 Other  → Specify:

3.11 Any deaths in the family due to asthma? Yes  No  Not known

**4. Medications**

4.1 Please record all 'baseline' asthma AND NON-ASTHMA medications ongoing as at the start of this visit.

*NB Remember to include pm medications, including e.g. salbutamol, epipen and antihistamine*

|     | Drug  | D o s e  |       |           | Route | S t a r t e d |      |                          |
|-----|-------|----------|-------|-----------|-------|---------------|------|--------------------------|
|     |       | Quantity | Units | Frequency |       | Month         | Year | NK                       |
| 1.  | _____ | _____    | _____ | _____     | _____ | M M / Y Y     |      | <input type="checkbox"/> |
| 2.  | _____ | _____    | _____ | _____     | _____ | M M / Y Y     |      | <input type="checkbox"/> |
| 3.  | _____ | _____    | _____ | _____     | _____ | M M / Y Y     |      | <input type="checkbox"/> |
| 4.  | _____ | _____    | _____ | _____     | _____ | M M / Y Y     |      | <input type="checkbox"/> |
| 5.  | _____ | _____    | _____ | _____     | _____ | M M / Y Y     |      | <input type="checkbox"/> |
| 6.  | _____ | _____    | _____ | _____     | _____ | M M / Y Y     |      | <input type="checkbox"/> |
| 7.  | _____ | _____    | _____ | _____     | _____ | M M / Y Y     |      | <input type="checkbox"/> |
| 8.  | _____ | _____    | _____ | _____     | _____ | M M / Y Y     |      | <input type="checkbox"/> |
| 9.  | _____ | _____    | _____ | _____     | _____ | M M / Y Y     |      | <input type="checkbox"/> |
| 10. | _____ | _____    | _____ | _____     | _____ | M M / Y Y     |      | <input type="checkbox"/> |
| 11. | _____ | _____    | _____ | _____     | _____ | M M / Y Y     |      | <input type="checkbox"/> |
| 12. | _____ | _____    | _____ | _____     | _____ | M M / Y Y     |      | <input type="checkbox"/> |
| 13. | _____ | _____    | _____ | _____     | _____ | M M / Y Y     |      | <input type="checkbox"/> |
| 14. | _____ | _____    | _____ | _____     | _____ | M M / Y Y     |      | <input type="checkbox"/> |
| 15. | _____ | _____    | _____ | _____     | _____ | M M / Y Y     |      | <input type="checkbox"/> |
| 16. | _____ | _____    | _____ | _____     | _____ | M M / Y Y     |      | <input type="checkbox"/> |
| 17. | _____ | _____    | _____ | _____     | _____ | M M / Y Y     |      | <input type="checkbox"/> |
| 18. | _____ | _____    | _____ | _____     | _____ | M M / Y Y     |      | <input type="checkbox"/> |
| 19. | _____ | _____    | _____ | _____     | _____ | M M / Y Y     |      | <input type="checkbox"/> |
| 20. | _____ | _____    | _____ | _____     | _____ | M M / Y Y     |      | <input type="checkbox"/> |
| 21. | _____ | _____    | _____ | _____     | _____ | M M / Y Y     |      | <input type="checkbox"/> |
| 22. | _____ | _____    | _____ | _____     | _____ | M M / Y Y     |      | <input type="checkbox"/> |
| 23. | _____ | _____    | _____ | _____     | _____ | M M / Y Y     |      | <input type="checkbox"/> |
| 24. | _____ | _____    | _____ | _____     | _____ | M M / Y Y     |      | <input type="checkbox"/> |
| 25. | _____ | _____    | _____ | _____     | _____ | M M / Y Y     |      | <input type="checkbox"/> |

### 5. Asthma Treatment Details

Have you ever been treated with ...

5.1 Omalizumab (Xolair)? Yes  No   
 Please enter details of dates, dose etc into Section 4 'Medications' above

5.2 Mepolizumab? Yes  No   
 Please enter details of dates, dose etc into Section 4 'Medications' above

5.3 Reslizumab? Yes  No   
 Please enter details of dates, dose etc into Section 4 'Medications' above

|                             |                           |                   |                     |                           |   |                     |
|-----------------------------|---------------------------|-------------------|---------------------|---------------------------|---|---------------------|
|                             |                           | <u>Start Date</u> |                     | <u>Ongoing?</u>           |   | <u>End Date</u>     |
| 5.4 Bronchial Thermoplasty? | Yes <input type="radio"/> | →                 | <u>DD / MM / YY</u> | Yes <input type="radio"/> |   |                     |
|                             | No <input type="radio"/>  | →                 | Q5.5                | No <input type="radio"/>  | → | <u>DD / MM / YY</u> |

5.5 Thermal laminar Airflow Device? Yes  No   
 e.g. from LASER study  
 Yes  → DD / MM / YY  
 No  → Q5.6

|                        |                         |                            |                                   |                                                   |                                |
|------------------------|-------------------------|----------------------------|-----------------------------------|---------------------------------------------------|--------------------------------|
| 5.6 Inhaler technique: | Date technique assessed | <u>DD / MM / YY</u>        |                                   |                                                   |                                |
|                        | Technique:              | Good <input type="radio"/> | Sub-optimal <input type="radio"/> | Poor <input type="radio"/>                        | Not done <input type="radio"/> |
|                        |                         | <i>No changes needed</i>   | <i>Minor changes needed</i>       | <i>Major changes, or change of inhaler needed</i> |                                |

5.7 Action plan: Adequate plan pre-existing? Yes  No   
 Action plan given? Yes  No   
 Date given DD / MM / YY

Comments .....

.....

**6. Smoking History**

**6.1 Smoking status**

Never smoked  → Q6.3

Current smoker  → Age started  years

Ex-smoker  → Age started  years      Age stopped  years

**6.2 Pack-year history**

**a) Cigarettes**

Number smoked per day  cigarettes

Number of years smoked  years

**b) Pipes / Cigars**

Number smoked per day  pipes / cigars → Pipes

Number of years smoked  years      Cigars

Other  → Specify

**c) Cigarillos**

Number smoked per day  cigarillos

Number of years smoked  years

**d) Tobacco**

Grams smoked per day  gms

or

Ounces smoked per day  oz

Number of years smoked  years

**Pack-years Calculation**

= Cigarettes per day x years smoked / 20

1 Cigar/pipe/cigarillo = 5 cigarettes

12.5g or 0.5oz tobacco = 20 cigarettes

**Total pack years**

**6.3 Passive exposure status**

Currently

In the past  → From: Parents?

Never       Spouse?       *Tick all that apply*

Others?  → Specify

Number of years  years

**E-cigarettes**

**6.4 Uses e-cigarettes regularly?**      Yes       No  → Next Section

**6.4.1 Used for how long?**       years       months

**6.4.2 Nicotine dose**       mgs      *(Common values are 0, 6, 12, 18, 24 and 36)*

**6.4.3 How long does it take to use 10ml of e-liquid?**       weeks       days

**6.4.4 Which flavour(s)?**

**Comments**

.....

.....

.....

## 7. Atopy History

7.1 Do you have any history of FOOD allergies?

Yes  No  → Q7.2 Not known

Please list the foods and the symptoms they cause *(Tick all that apply)*

|    | <u>Food</u>          | <u>Respiratory</u>       | <u>Ocular</u>            | <u>Nasal</u>             | <u>Rash</u>              | <u>Vomiting</u>          | <u>Anaphylaxis</u>       | <u>Other</u>             | <u>If 'Other', specify</u> |
|----|----------------------|--------------------------|--------------------------|--------------------------|--------------------------|--------------------------|--------------------------|--------------------------|----------------------------|
| a) | <input type="text"/> | <input type="checkbox"/> | <input type="checkbox"/> | <input type="checkbox"/> | <input type="checkbox"/> | <input type="checkbox"/> | <input type="checkbox"/> | <input type="checkbox"/> | <input type="text"/>       |
| b) | <input type="text"/> | <input type="checkbox"/> | <input type="checkbox"/> | <input type="checkbox"/> | <input type="checkbox"/> | <input type="checkbox"/> | <input type="checkbox"/> | <input type="checkbox"/> | <input type="text"/>       |
| c) | <input type="text"/> | <input type="checkbox"/> | <input type="checkbox"/> | <input type="checkbox"/> | <input type="checkbox"/> | <input type="checkbox"/> | <input type="checkbox"/> | <input type="checkbox"/> | <input type="text"/>       |
| d) | <input type="text"/> | <input type="checkbox"/> | <input type="checkbox"/> | <input type="checkbox"/> | <input type="checkbox"/> | <input type="checkbox"/> | <input type="checkbox"/> | <input type="checkbox"/> | <input type="text"/>       |
| e) | <input type="text"/> | <input type="checkbox"/> | <input type="checkbox"/> | <input type="checkbox"/> | <input type="checkbox"/> | <input type="checkbox"/> | <input type="checkbox"/> | <input type="checkbox"/> | <input type="text"/>       |
| f) | <input type="text"/> | <input type="checkbox"/> | <input type="checkbox"/> | <input type="checkbox"/> | <input type="checkbox"/> | <input type="checkbox"/> | <input type="checkbox"/> | <input type="checkbox"/> | <input type="text"/>       |

7.2 Do you have any history of DRUG allergies?

Yes  No  → Q7.3 Not known

Please list the drugs and the symptoms they cause *(Include NSAID intolerance)*

|    | <u>Drug</u>          | <u>Respiratory</u>       | <u>Ocular</u>            | <u>Nasal</u>             | <u>Rash</u>              | <u>Vomiting</u>          | <u>Anaphylaxis</u>       | <u>Other</u>             | <u>If 'Other', specify</u> |
|----|----------------------|--------------------------|--------------------------|--------------------------|--------------------------|--------------------------|--------------------------|--------------------------|----------------------------|
| a) | <input type="text"/> | <input type="checkbox"/> | <input type="checkbox"/> | <input type="checkbox"/> | <input type="checkbox"/> | <input type="checkbox"/> | <input type="checkbox"/> | <input type="checkbox"/> | <input type="text"/>       |
| b) | <input type="text"/> | <input type="checkbox"/> | <input type="checkbox"/> | <input type="checkbox"/> | <input type="checkbox"/> | <input type="checkbox"/> | <input type="checkbox"/> | <input type="checkbox"/> | <input type="text"/>       |
| c) | <input type="text"/> | <input type="checkbox"/> | <input type="checkbox"/> | <input type="checkbox"/> | <input type="checkbox"/> | <input type="checkbox"/> | <input type="checkbox"/> | <input type="checkbox"/> | <input type="text"/>       |
| d) | <input type="text"/> | <input type="checkbox"/> | <input type="checkbox"/> | <input type="checkbox"/> | <input type="checkbox"/> | <input type="checkbox"/> | <input type="checkbox"/> | <input type="checkbox"/> | <input type="text"/>       |
| e) | <input type="text"/> | <input type="checkbox"/> | <input type="checkbox"/> | <input type="checkbox"/> | <input type="checkbox"/> | <input type="checkbox"/> | <input type="checkbox"/> | <input type="checkbox"/> | <input type="text"/>       |
| f) | <input type="text"/> | <input type="checkbox"/> | <input type="checkbox"/> | <input type="checkbox"/> | <input type="checkbox"/> | <input type="checkbox"/> | <input type="checkbox"/> | <input type="checkbox"/> | <input type="text"/>       |

7.3 Do you have any family history of atopy?

*(e.g. asthma, food allergy, hay fever or eczema)*

Yes  No  Not known

Who? *(Tick all that apply)*

|         |                          |          |                          |
|---------|--------------------------|----------|--------------------------|
| Father  | <input type="checkbox"/> | Mother   | <input type="checkbox"/> |
| Brother | <input type="checkbox"/> | Sister   | <input type="checkbox"/> |
| Other   | <input type="checkbox"/> | Specify: | <input type="text"/>     |

Comments .....

.....

.....

**8. Nasal Disease**

- 8.1 Do you have any history of rhinitis? Yes  No  Not known
- 8.2 Do you have any history of nasal polyps? Yes  No  Not known
- 8.3 Have you had nasal surgery? Yes  No  Not known

Comments \_\_\_\_\_  
 \_\_\_\_\_

- 8.4 Have you any history of Perennial Allergy? Yes  No  Not known
- 8.5 Have you any history of Seasonal Allergy? Yes  No  Not known

Comments \_\_\_\_\_  
 \_\_\_\_\_

8.6 CT Sinuses performed? Yes  No  N/K   
 (Clinical indication only)

Date performed DD / MM / YY

Findings:

- Normal
- Polyps
- Mucosal thickening
- Sinus opacification / abnormality
- Abnormal nasal turbinates
- Other → Specify \_\_\_\_\_

**9. Reflux History**

9.1 Diagnosed with GORD? Yes  No  N/K   
 (pt self-report or clinician diagnosis in letter/notes)

9.2 Any symptoms of GORD?

- Yes, and ongoing despite on treatment
- Yes, but not on treatment at present
- No, on treatment and symptoms controlled
- No

9.3 Oesophageal testing performed / planned?  
 (Only if clinically indicated)

|                                          | <u>Yes</u>            | <u>No / Never</u>                 | <u>Requested, not yet done</u> | <u>Requested, but not done for some reason e.g. DNA</u> |
|------------------------------------------|-----------------------|-----------------------------------|--------------------------------|---------------------------------------------------------|
| a) Barium swallow?                       | <input type="radio"/> | <input type="radio"/>             | <input type="radio"/>          | <input type="radio"/>                                   |
|                                          | → Date                | <u>DD</u> / <u>MM</u> / <u>YY</u> |                                |                                                         |
| b) OGD?                                  | <input type="radio"/> | <input type="radio"/>             | <input type="radio"/>          | <input type="radio"/>                                   |
|                                          | → Date                | <u>DD</u> / <u>MM</u> / <u>YY</u> |                                |                                                         |
| c) Oesophageal manometry PH / impedance? | <input type="radio"/> | <input type="radio"/>             | <input type="radio"/>          | <input type="radio"/>                                   |
|                                          | → Date                | <u>DD</u> / <u>MM</u> / <u>YY</u> |                                |                                                         |
| d) Other?                                | <input type="radio"/> | <input type="radio"/>             | <input type="radio"/>          | <input type="radio"/>                                   |
|                                          | → Date                | <u>DD</u> / <u>MM</u> / <u>YY</u> |                                |                                                         |
|                                          | → Specify             | _____                             |                                |                                                         |



### 10. Psychological History

10.1 Diagnosis\* of:

- Depression? Yes  No
- Anxiety? Yes  No
- Other psychological / psychiatric comorbidity? Yes  No

\* Patient self-report or clinician diagnosis in letter / notes. Specify \_\_\_\_\_

10.2 Seen by mental health professionals?

|                                                                                                                                                                                                                                                                   | <u>Yes</u>            | <u>No /<br/>Never</u> | <u>Requested,<br/>not yet done</u> | <u>Requested, but<br/>not done for some<br/>reason e.g. DNA</u> |
|-------------------------------------------------------------------------------------------------------------------------------------------------------------------------------------------------------------------------------------------------------------------|-----------------------|-----------------------|------------------------------------|-----------------------------------------------------------------|
| a) Psychiatrist?                                                                                                                                                                                                                                                  | <input type="radio"/> | <input type="radio"/> | <input type="radio"/>              | <input type="radio"/>                                           |
| <div style="border: 1px solid #ccc; padding: 5px; width: fit-content;">                     Date <input type="text" value="DD / MM / YY"/><br/>                     Completed <input type="radio"/><br/>                     Ongoing <input type="radio"/> </div> |                       |                       |                                    |                                                                 |
| b) Psychologist?                                                                                                                                                                                                                                                  | <input type="radio"/> | <input type="radio"/> | <input type="radio"/>              | <input type="radio"/>                                           |
| <div style="border: 1px solid #ccc; padding: 5px; width: fit-content;">                     Date <input type="text" value="DD / MM / YY"/><br/>                     Completed <input type="radio"/><br/>                     Ongoing <input type="radio"/> </div> |                       |                       |                                    |                                                                 |
| c) Specialist asthma psychologist?                                                                                                                                                                                                                                | <input type="radio"/> | <input type="radio"/> | <input type="radio"/>              | <input type="radio"/>                                           |
| <div style="border: 1px solid #ccc; padding: 5px; width: fit-content;">                     Date <input type="text" value="DD / MM / YY"/><br/>                     Completed <input type="radio"/><br/>                     Ongoing <input type="radio"/> </div> |                       |                       |                                    |                                                                 |
| d) Other?                                                                                                                                                                                                                                                         | <input type="radio"/> | <input type="radio"/> | <input type="radio"/>              | <input type="radio"/>                                           |
| <div style="border: 1px solid #ccc; padding: 5px; width: fit-content;">                     Date <input type="text" value="DD / MM / YY"/><br/>                     Completed <input type="radio"/><br/>                     Ongoing <input type="radio"/> </div> |                       |                       |                                    |                                                                 |
| Specify _____                                                                                                                                                                                                                                                     |                       |                       |                                    |                                                                 |

### 11. Breathing Pattern Disorders

- 11.1 Diagnosis\* of:
- Vocal cord dysfunction? Yes  No
  - Dysfunctional breathing? Yes  No

\* patient self-report or clinician diagnosis in letter / notes.

#### 11.2 Investigations for VCD

|                  | <u>Yes</u>                                                           | <u>No /<br/>Never</u> | <u>Requested,<br/>not yet done</u> | <u>Requested, but<br/>not done for some<br/>reason e.g. DNA</u> |
|------------------|----------------------------------------------------------------------|-----------------------|------------------------------------|-----------------------------------------------------------------|
| a) Nasendoscopy? | <input type="radio"/>                                                | <input type="radio"/> | <input type="radio"/>              | <input type="radio"/>                                           |
|                  | <input type="radio"/> Date <input type="text" value="DD / MM / YY"/> |                       |                                    |                                                                 |
| b) Other?        | <input type="radio"/>                                                | <input type="radio"/> | <input type="radio"/>              | <input type="radio"/>                                           |
|                  | <input type="radio"/> Date <input type="text" value="DD / MM / YY"/> |                       |                                    |                                                                 |
|                  | <input type="radio"/> Specify <input type="text"/>                   |                       |                                    |                                                                 |

#### 11.3 Seen by BPD/VCD specialist?

|                                       | <u>Yes</u>                                                           | <u>No /<br/>Never</u> | <u>Requested,<br/>not yet done</u> | <u>Requested, but<br/>not done for some<br/>reason e.g. DNA</u> |
|---------------------------------------|----------------------------------------------------------------------|-----------------------|------------------------------------|-----------------------------------------------------------------|
| a) Physiotherapist?                   | <input type="radio"/>                                                | <input type="radio"/> | <input type="radio"/>              | <input type="radio"/>                                           |
|                                       | <input type="radio"/> Date <input type="text" value="DD / MM / YY"/> |                       |                                    |                                                                 |
|                                       | Completed <input type="radio"/><br>Ongoing <input type="radio"/>     |                       |                                    |                                                                 |
| b) Specialist asthma physiotherapist? | <input type="radio"/>                                                | <input type="radio"/> | <input type="radio"/>              | <input type="radio"/>                                           |
|                                       | <input type="radio"/> Date <input type="text" value="DD / MM / YY"/> |                       |                                    |                                                                 |
|                                       | Completed <input type="radio"/><br>Ongoing <input type="radio"/>     |                       |                                    |                                                                 |
| c) Speech therapist?                  | <input type="radio"/>                                                | <input type="radio"/> | <input type="radio"/>              | <input type="radio"/>                                           |
|                                       | <input type="radio"/> Date <input type="text" value="DD / MM / YY"/> |                       |                                    |                                                                 |
|                                       | Completed <input type="radio"/><br>Ongoing <input type="radio"/>     |                       |                                    |                                                                 |
| d) Other?                             | <input type="radio"/>                                                | <input type="radio"/> | <input type="radio"/>              | <input type="radio"/>                                           |
|                                       | <input type="radio"/> Date <input type="text" value="DD / MM / YY"/> |                       |                                    |                                                                 |
|                                       | Completed <input type="radio"/><br>Ongoing <input type="radio"/>     |                       |                                    |                                                                 |
|                                       | <input type="radio"/> Specify <input type="text"/>                   |                       |                                    |                                                                 |

**12. Comorbidities and Procedures****12.1 Comorbidities**

| Condition                                          | <u>Previously had?</u> |                       |                       | <u>Currently have?</u> |                       |                       |
|----------------------------------------------------|------------------------|-----------------------|-----------------------|------------------------|-----------------------|-----------------------|
|                                                    | <u>Yes</u>             | <u>No</u>             | <u>N/K</u>            | <u>Yes</u>             | <u>No</u>             | <u>N/K</u>            |
| a) COPD                                            | <input type="radio"/>  | <input type="radio"/> | <input type="radio"/> | <input type="radio"/>  | <input type="radio"/> | <input type="radio"/> |
| b) Allergic Bronchopulmonary Aspergillosis or SAFS | <input type="radio"/>  | <input type="radio"/> | <input type="radio"/> | <input type="radio"/>  | <input type="radio"/> | <input type="radio"/> |
| c) Non-CF Bronchiectasis                           | <input type="radio"/>  | <input type="radio"/> | <input type="radio"/> | <input type="radio"/>  | <input type="radio"/> | <input type="radio"/> |
| d) Cystic Fibrosis                                 | <input type="radio"/>  | <input type="radio"/> | <input type="radio"/> | <input type="radio"/>  | <input type="radio"/> | <input type="radio"/> |
| e) Bronchiolitis                                   | <input type="radio"/>  | <input type="radio"/> | <input type="radio"/> | <input type="radio"/>  | <input type="radio"/> | <input type="radio"/> |
| f) Churg Strauss Syndrome                          | <input type="radio"/>  | <input type="radio"/> | <input type="radio"/> | <input type="radio"/>  | <input type="radio"/> | <input type="radio"/> |
| g) Chronic urticaria / angioedema                  | <input type="radio"/>  | <input type="radio"/> | <input type="radio"/> | <input type="radio"/>  | <input type="radio"/> | <input type="radio"/> |
| h) Sulphite sensitivity                            | <input type="radio"/>  | <input type="radio"/> | <input type="radio"/> | <input type="radio"/>  | <input type="radio"/> | <input type="radio"/> |
| i) Salicylate (aspirin) sensitivity                | <input type="radio"/>  | <input type="radio"/> | <input type="radio"/> | <input type="radio"/>  | <input type="radio"/> | <input type="radio"/> |
| j) Eczema                                          | <input type="radio"/>  | <input type="radio"/> | <input type="radio"/> | <input type="radio"/>  | <input type="radio"/> | <input type="radio"/> |
| k) Latex allergy                                   | <input type="radio"/>  | <input type="radio"/> | <input type="radio"/> | <input type="radio"/>  | <input type="radio"/> | <input type="radio"/> |
| l) Sleep apnoea                                    | <input type="radio"/>  | <input type="radio"/> | <input type="radio"/> | <input type="radio"/>  | <input type="radio"/> | <input type="radio"/> |
| <b><u>Other Conditions</u></b> (write in)          |                        |                       |                       |                        |                       |                       |
| 1. _____                                           | <input type="radio"/>  |                       |                       | <input type="radio"/>  | <input type="radio"/> | <input type="radio"/> |
| 2. _____                                           | <input type="radio"/>  |                       |                       | <input type="radio"/>  | <input type="radio"/> | <input type="radio"/> |
| 3. _____                                           | <input type="radio"/>  |                       |                       | <input type="radio"/>  | <input type="radio"/> | <input type="radio"/> |
| 4. _____                                           | <input type="radio"/>  |                       |                       | <input type="radio"/>  | <input type="radio"/> | <input type="radio"/> |
| 5. _____                                           | <input type="radio"/>  |                       |                       | <input type="radio"/>  | <input type="radio"/> | <input type="radio"/> |
| 6. _____                                           | <input type="radio"/>  |                       |                       | <input type="radio"/>  | <input type="radio"/> | <input type="radio"/> |

**12.2 Procedures**

|                                           | <u>Ever Received?</u> |                       |                       | <u>If 'Yes', Date of Procedure</u> |
|-------------------------------------------|-----------------------|-----------------------|-----------------------|------------------------------------|
|                                           | <u>Yes</u>            | <u>No</u>             | <u>N/K</u>            |                                    |
| a) Bariatric surgery                      | <input type="radio"/> | <input type="radio"/> | <input type="radio"/> | <u>DD / MM / YY</u>                |
| b) Hiatus hernia repair                   | <input type="radio"/> | <input type="radio"/> | <input type="radio"/> | <u>DD / MM / YY</u>                |
| c) Hysterectomy                           | <input type="radio"/> | <input type="radio"/> | <input type="radio"/> | <u>DD / MM / YY</u>                |
| <b><u>Other Procedures</u></b> (write in) |                       |                       |                       |                                    |
| 1. _____                                  | <input type="radio"/> |                       |                       | <u>DD / MM / YY</u>                |
| 2. _____                                  | <input type="radio"/> |                       |                       | <u>DD / MM / YY</u>                |
| 3. _____                                  | <input type="radio"/> |                       |                       | <u>DD / MM / YY</u>                |
| 4. _____                                  | <input type="radio"/> |                       |                       | <u>DD / MM / YY</u>                |
| 5. _____                                  | <input type="radio"/> |                       |                       | <u>DD / MM / YY</u>                |
| 6. _____                                  | <input type="radio"/> |                       |                       | <u>DD / MM / YY</u>                |

**13. Imaging - HRCT**

13.1 HRCT performed? Yes  No

→ 13.2 Date performed DD / MM / YY

13.3 HRCT evidence of:

|                                           | <u>Yes</u>            | <u>No</u>             |
|-------------------------------------------|-----------------------|-----------------------|
| Central bronchiectasis                    | <input type="radio"/> | <input type="radio"/> |
| Other bronchiectasis                      | <input type="radio"/> | <input type="radio"/> |
| Bronchial dilation without bronchiectasis | <input type="radio"/> | <input type="radio"/> |
| Bronchial wall thickening                 | <input type="radio"/> | <input type="radio"/> |
| Ground glass shadowing                    | <input type="radio"/> | <input type="radio"/> |
| Mucus plugging                            | <input type="radio"/> | <input type="radio"/> |
| Air trapping                              | <input type="radio"/> | <input type="radio"/> |
| Emphysema - Centrilobular                 | <input type="radio"/> | <input type="radio"/> |
| Emphysema - Panacinar                     | <input type="radio"/> | <input type="radio"/> |
| Other category / other findings           | <input type="radio"/> | <input type="radio"/> |

→ Specify in 'Comments' below

or

Scan reported as normal by radiologist

Comments .....

.....

.....

**14. Imaging - DEXA**

14.1 DEXA scan performed? Yes  No

→ 14.2 Date performed DD / MM / YY

14.3 Spinal bone density (L1-4) T score

14.4 Femoral neck bone density (L1-4) T score: a) Left

b) Right

Comments .....

.....

.....

**15. Concordance**

15.1 % concordance preventer   %

15.2 Number of refills for the reliever   per how many weeks?   wks

- 15.3 Clinical impression of concordance
- Good
  - Sub-optimal
  - Poor
  - Unable to comment

Comments .....

.....

.....

**At this point ask the patient to complete the Questionnaires.**

16. Dietary Assessment

16.1 Body composition assessed? Yes  No  → Q16.2

| Test | Result                                 |
|------|----------------------------------------|
| FFM  | <input type="text"/> kg                |
| FM   | <input type="text"/> kg                |
| FFMi | <input type="text"/> kg/m <sup>2</sup> |
| SMM  | <input type="text"/> kg                |
| PhA  | <input type="text"/> degrees           |

16.2 Seen by asthma specialist dietician?

- Not required
  - Ongoing
  - To be seen
  - Discharged, treated
  - Discharged, DNA
- Tick ONE only*

17. Research Samples

17.1 Date research bloods taken  DD / MM / YY

17.2 Date urine taken  DD / MM / YY

17.3 Date sputum taken  DD / MM / YY

17b. Research Samples for Patients Enrolled in "WATCH NIH" Study

17b.1 Date PBMC #1  DD / MM / YY

17b.2 Date PBMC #2  DD / MM / YY

17b.3 Date PBMC #3  DD / MM / YY

17b.4 Date Sputum  DD / MM / YY

17b.5 Date Bronch  DD / MM / YY

18. FeNO (Exhaled Nitric Oxide)

18.1 Was FeNO(50) done? Yes  No  → 18.2

18.1.1 Date performed  DD / MM / YY

18.1.2 Where done? UHS PFT  UHS Research Lab.  IOW OPD Clinic   
 UHS Resp. Centre  Portsmouth OPD Clinic

18.1.3 Did the patient refrain from eating and drinking for at least 2 hours prior to the FeNO measurement? Yes  No  Unknown   
 (Arrow from No points to: Consider performing test at next visit)

18.1.4 Bedfont (50ml/sec) 1.  2.  3.

18.2 Was Multiple Flow NO done? Yes  No  → Next Section

*(University Hospital Southampton only)*

18.2.1 Date performed  DD / MM / YY

18.2.2 Test results Attach the results printout to this CRF. Please ensure the Subject No. is written clearly on the printout.

Comments

.....

.....

.....

**19. Spirometry**

19.1 Was Spirometry done? Yes  → 19.2 No  → Next Section  
*Use historical REVERSIBILITY data if available within last 12 months*

19.2 Date of test

19.3 Where done? UHS PFT  UHS Research Lab.  IOW OPD Clinic   
 UHS Resp. Centre  Portsmouth OPD Clinic

19.4 Was acceptable spirometry obtained? Yes  No   
*(Only record parameters of good quality)*

19.5 Was a washout period observed? Yes  No  → Record results as POST-BD  
*(SABA 4 hours and LABA 12 hours)*

19.6 Last use of short-acting β-agonist Date  Time  or NA  *e.g. if using maintenance inhaler as reliever*  
*(Salbutamol, Ventolin, Terbutaline, Bricanyl)*

19.7 Last use of long-acting β-agonist Date  Time   
*(Formoterol, Fumarate, Salmeterol, Bambuterol)*

19.8 Test results *Attach the results printout to this CRF.  
 Please ensure the Subject No. is written clearly on the printout.*

Comments .....

**20. Lung Volumes**

20.1 Date of test

20.2 Where done? UHS PFT  UHS Research Lab.  IOW OPD Clinic   
 Portsmouth OPD Clinic

20.3 Method used Plethysmography  Other  → Specify \_\_\_\_\_  
 Nitrogen washout

20.4 Test results *Attach the results printout to this CRF.  
 Please ensure the Subject No. is written clearly on the printout.*

Comments .....

**21. Single Breath Diffusion / Transfer Facto**

21.1 Was test done? Yes  No  → Next Section

→ 21.2 Date of test

21.3 Where done? UHS PFT  UHS Research Lab.  IOW OPD Clinic   
 Portsmouth OPD Clinic

21.4 Test results *Attach the results printout to this CRF.  
 Please ensure the Subject No. is written clearly on the printout.*

Comments .....

**22. Impulse Oscillometry (IOS)**22.1 Was test done? Yes  No  → Next Section

If Yes:

22.2 Date of tests  DD / MM / YY22.3 Where done? UHS PFT  UHS Research Lab.  IOW OPD Clinic   
Portsmouth OPD Clinic 22.4 Was a washout period observed? Yes  No  → Record results as POST-BD  
(SABA 4 hours and LABA 12 hours)22.5 Last use of short-acting  $\beta$ -agonist Date  DD / MM / YY Time  HH : MM or NA  e.g. if using maintenance inhaler as reliever  
(Salbutamol, Ventolin, Terbutaline, Bricanyl)22.6 Last use of long-acting  $\beta$ -agonist Date  DD / MM / YY Time  HH : MM  
(Formoterol, Fumarate, Salmeterol, Bambuterol)22.7 Test results Attach the results printout to this CRF.  
Please ensure the Subject No. is written clearly on the printout.Comments .....  
.....  
.....**23. Multiple Breath Nitrogen Washout (MBNW)** (University Hospital Southampton only)23.1 Was test done? Yes  No  → Next Section→ 23.2 Date of test  DD / MM / YY23.3 Time of test  HH : MM23.4 Test Results Attach the results printout to this CRF.  
Please ensure the Subject No. is written clearly on the printout.Comments .....  
.....  
.....

**24. Allergy Testing**

24.1 Skin prick test form attached? Yes  No

24.2 Date performed DD/MM/YY

24.3 Number of days H1 or H2 anti-histamines omitted? n/a  or  days  
*(If greater than 3 days just enter '3')*

24.4 Number of days Tricyclic Antidepressants (TCAs) omitted? n/a  or  days  
*(If greater than 7 days just enter '7')*

Comments .....

.....

.....

**25. Allergy RAST Testing**

| Allergen                | Test Date                         | Result               | Grade                | Notes                |
|-------------------------|-----------------------------------|----------------------|----------------------|----------------------|
| 1. <input type="text"/> | <u>DD</u> / <u>MM</u> / <u>YY</u> | <input type="text"/> | <input type="text"/> | <input type="text"/> |
| 2. <input type="text"/> | <u>DD</u> / <u>MM</u> / <u>YY</u> | <input type="text"/> | <input type="text"/> | <input type="text"/> |
| 3. <input type="text"/> | <u>DD</u> / <u>MM</u> / <u>YY</u> | <input type="text"/> | <input type="text"/> | <input type="text"/> |
| 4. <input type="text"/> | <u>DD</u> / <u>MM</u> / <u>YY</u> | <input type="text"/> | <input type="text"/> | <input type="text"/> |
| 5. <input type="text"/> | <u>DD</u> / <u>MM</u> / <u>YY</u> | <input type="text"/> | <input type="text"/> | <input type="text"/> |

**26. Sputum**

26.1 Sputum eosinophils  %

26.2 Sputum neutrophils  %

**27. Bronchoscopy**

27.1 Bronchoscopy performed? Yes  No

*(Only if clinically indicated)*

27.2 Date performed DD/MM/YY

27.3 Histological findings? Yes  No   
*(Attach printout report)*

27.4 Brushings and Biopsies

|              | Number                                    | Time                  | Site of Samples      |
|--------------|-------------------------------------------|-----------------------|----------------------|
| a) Biopsies  | <input type="text"/> <input type="text"/> | <u>HH</u> : <u>MM</u> | <input type="text"/> |
| b) Brushings | <input type="text"/> <input type="text"/> | <u>HH</u> : <u>MM</u> | <input type="text"/> |

27.5 Bronchial lavage

In  ml Out  ml

Comments .....

.....

.....



**28. Other Research Study Participations**

- a) WATCH BI
- b) WATCH NIH
- c) WATCH GSK
- d) Panos
- e) WSAC
- f) UBIOURED
- g) SoMOSA
- h) RASP UK
- i) RASP Bronch
- j) MEPO
- k) MIDAS

**Others (specify)**

- i) \_\_\_\_\_
- ii) \_\_\_\_\_
- iii) \_\_\_\_\_
- iv) \_\_\_\_\_
